# Supplementary material for: Sex Differences in Protein Expression and Their Perturbations in Amniotic Fluid Cells of Down Syndrome Fetuses
Source: PubMed Central journal article supplement — ACS Omega. 2022 Sep 28;7(40):35981–92. doi: 10.1021/acsomega.2c05152 (PMC9558608; doi:10.1021/acsomega.2c05152), 2022-09-28

# **Sex differences in protein expression and their perturbations in amniotic fluid cells of Down syndrome fetuses**

Yanyan Liu<sup>1</sup>, Email: liuyy39@qq.com

Xuan Zhang<sup>1</sup>, Email: 19280636@qq.com

Lili Zhang<sup>1</sup>, Email: 504321936@qq.com

Hongmei Zhu<sup>1</sup>, Email: zhuhm3344@126.com

Jiurong Chen<sup>1</sup>, Email: 779836413@qq.com

Ziyuan Lin<sup>2</sup>, Email: 451960679@qq.com

Bin Zhou<sup>3</sup>, Email: zb630@163.com

Shanling Liu<sup>1</sup>, Email: sunny630@126.com

He Wang<sup>1</sup>, Email: wanghe\_cd@126.com

Huaqin Sun<sup>2\*</sup>, Email: sunhuaqin@scu.edu.cn

<sup>1</sup>Prenatal Diagnosis Center, Department of Obstetrics & Gynecologic, Key Laboratory of Birth Defects and Related Diseases of Women and Children (Sichuan University), Ministry of Education, West China Second University Hospital, Sichuan University, Chengdu 610041, People's Republic of China

<sup>2</sup>SCU-CUHK Joint Laboratory for Reproductive Medicine, Key Laboratory of Birth Defects and Related Diseases of Women and Children (Sichuan University), Ministry of Education, Department of Pediatrics, West China Second University Hospital, Sichuan University, Chengdu 610041, People's Republic of China

<sup>3</sup>Laboratory of Molecular Translational Medicine, Center for Translational Medicine, Department of Obstetrics and Gynecology, Key Laboratory of Birth Defects and Related Diseases of Women and Children (Sichuan University), Ministry of Education, West China Second University Hospital, Sichuan University, Chengdu 610041, People's Republic of China

\*Correspondence and requests for materials should be addressed to H.S. ([sunhuaqin@scu.edu.cn](mailto:sunhuaqin@scu.edu.cn))

The following supporting information is available free of charge at ACS website <http://pubs.acs.org>

## **Supplementary Information Materials and Methods**

### **Cell lysis protocol for proteomic analysis**

Samples were sonicated three times on ice using a high intensity ultrasonic processor (Scientz) in lysis buffer (8 M urea, 1% Protease Inhibitor Cocktail). (Note: For PTM experiments, inhibitors were also added to the lysis buffer, e.g. 3  $\mu$ M TSA and 50 mM NAM for acetylation.) The remaining debris was removed by centrifugation at 12,000 g at 4 °C for 10 min. Finally, the supernatant was collected and the protein concentration was determined with BCA kit according to the manufacturer's instructions.

For digestion, the protein solution was reduced with 5 mM dithiothreitol for 30 min at 56 °C and alkylated with 11 mM iodoacetamide for 15 min at room temperature in

darkness. The protein sample was then diluted by adding 100 mM TEAB to urea concentration less than 2M. Finally, trypsin was added at 1:50 trypsin-to-protein mass ratio for the first digestion overnight and 1:100 trypsin-to-protein mass ratio for a second 4 h-digestion. After trypsin digestion, peptide was desalted by Strata X C18 SPE column (Phenomenex) and vacuum-dried. Peptide was reconstituted in 0.5 M TEAB and processed according to the manufacturer's protocol for TMT kit/iTRAQ kit (ThermoFisher Scientific-TMT sixplex-90068). Briefly, one unit of TMT/iTRAQ reagent were thawed and reconstituted in acetonitrile. The peptide mixtures were then incubated for 2 h at room temperature and pooled, desalted and dried by vacuum centrifugation. The tryptic peptides were fractionated into fractions by high pH reverse-phase HPLC using Thermo Betasil C18 column (5  $\mu$ m particles, 10 mm ID, 250mm length). Briefly, peptides were first separated with a gradient of 8% to 32% acetonitrile (pH 9.0) over 60 min into 60 fractions. Then, the peptides were combined into 6 fractions and dried by vacuum centrifuging. The tryptic peptides were dissolved in 0.1% formic acid (solvent A), directly loaded onto a home-made reversed-phase analytical column (15-cm length, 75  $\mu$ m i.d.). The gradient was comprised of an increase from 6% to 23% solvent B (0.1% formic acid in 98% acetonitrile) over 26 min, 23% to 35% in 8 min and climbing to 80% in 3 min then holding at 80% for the last 3 min, all at a constant flow rate of 400 nL/min on an EASY-nLC 1000 UPLC system.

The peptides were subjected to NSI source followed by tandem mass spectrometry (MS/MS) in Q Exactive<sup>TM</sup> Plus (Thermo) coupled online to the UPLC. The electrospray voltage applied was 2.0 kV. The m/z scan range was 350 to 1800 for full

scan, and intact peptides were detected in the Orbitrap at a resolution of 70,000. Peptides were then selected for MS/MS using NCE setting as 28 and the fragments were detected in the Orbitrap at a resolution of 17,500. A data-dependent procedure that alternated between one MS scan followed by 20 MS/MS scans with 15.0s dynamic exclusion. Automatic gain control (AGC) was set at 5E4. Fixed first mass was set as 100 m/z. The resulting MS/MS data were processed using Maxquant search engine (v.1.5.2.8). Tandem mass spectra were searched against human uniprot database concatenated with reverse decoy database. Trypsin/P was specified as cleavage enzyme allowing up to 4 missing cleavages. The mass tolerance for precursor ions was set as 20 ppm in First search and 5 ppm in Main search, and the mass tolerance for fragment ions was set as 0.02 Da. Carbamidomethyl on Cys was specified as fixed modification and Acetylation modification and oxidation on Met were specified as variable modifications. FDR was adjusted to < 1% and minimum score for modified peptides was set > 40. The Reagent label of T21 male was 127, T21 female was 129, CN male was 130, CN female was 131.

## **Bioinformatics Methods**

### **Annotation Methods**

#### **GO Annotation**

The Gene Ontology, or GO, is a major bioinformatics initiative to unify the representation of gene and gene product attributes across all species. More specifically, the project aims to:

1. Maintain and develop its controlled vocabulary of gene and gene product attributes;
2. Annotate genes and gene products, and assimilate and disseminate annotation data;
3. Provide tools for easy access to all aspects of the data provided by the project.

The ontology covers three domains:

1. Cellular component: A cellular component is just that, a component of a cell, but with the proviso that it is part of some larger object; this may be an anatomical structure (e.g. rough endoplasmic reticulum or nucleus) or a gene product group (e.g. ribosome, proteasome or a protein dimer).
2. Molecular function: Molecular function describes activities, such as catalytic or binding activities, that occur at the molecular level. GO molecular function terms represent activities rather than the entities (molecules or complexes) that perform the actions, and do not specify where or when, or in what context, the action takes place.
3. Biological process: A biological process is series of events accomplished by one or more ordered assemblies of molecular functions. It can be difficult to distinguish between a biological process and a molecular function, but the general rule is that a process must have more than one distinct steps.

Gene Ontology (GO) annotation proteome was derived from the UniProt-GOA database (<http://www.ebi.ac.uk/GOA/>). Firstly, Converting identified protein ID to UniProt ID and then mapping to GO IDs by protein ID. If some identified proteins were not annotated by UniProt-GOA database, the InterProScan soft would be used to annotated protein's GO functional based on protein sequence alignment method. Then proteins were classified by Gene Ontology annotation based on three categories:

biological process, cellular component and molecular function.

### **Domain Annotation**

A protein domain is a conserved part of a given protein sequence and structure that can evolve, function and exist independently of the rest of the protein chain. Each domain forms a compact three-dimensional structure and often can be independently stable and folded. Many proteins consist of several structural domains. One domain may appear in a variety of differentially expressed proteins. Molecular evolution uses domains as building blocks and these may be recombined in different arrangements to create proteins with different functions. Domains vary in length from between about 25 amino acids up to 500 amino acids in length. The shortest domains such as zinc fingers are stabilized by metal ions or disulfide bridges. Domains often form functional units, such as the calcium-binding EF hand domain of calmodulin. Because they are independently stable, domains can be “swapped” by genetic engineering between one protein and another to make chimeric proteins.

Identified proteins domain functional description were annotated by InterProScan (a sequence analysis application) based on protein sequence alignment method, and the InterPro domain database was used. InterPro (<http://www.ebi.ac.uk/interpro/>) is a database that integrates diverse information about protein families, domains and functional sites, and makes it freely available to the public via Web-based interfaces and services. Central to the database are diagnostic models, known as signatures, against which protein sequences can be searched to determine their potential function.

InterPro has utility in the large-scale analysis of whole genomes and meta-genomes, as well as in characterizing individual protein sequences.

### **KEGG Pathway Annotation**

KEGG connects known information on molecular interaction networks, such as pathways and complexes (the “Pathway” database), information about genes and proteins generated by genome projects (including the gene database) and information about biochemical compounds and reactions (including compound and reaction databases). These databases are different networks, known as the “protein network”, and the “chemical universe” respectively. There are efforts in progress to add to the knowledge of KEGG, including information regarding ortholog clusters in the KEGG Orthology database. KEGG Pathways mainly including: Metabolism, Genetic Information Processing, Environmental Information Processing, Cellular Processes, Rat Diseases, Drug development. Kyoto Encyclopedia of Genes and Genomes (KEGG) database was used to annotate protein pathway. Firstly, using KEGG online service tools KAAS to annotated protein’s KEGG database description. Then mapping the annotation result on the KEGG pathway database using KEGG online service tools KEGG mapper.

### **Subcellular Localization**

The cells of eukaryotic organisms are elaborately subdivided into functionally distinct membrane bound compartments. Some major constituents of eukaryotic cells are:

extracellular space, cytoplasm, nucleus, mitochondria, Golgi apparatus, endoplasmic reticulum (ER), peroxisome, vacuoles, cytoskeleton, nucleoplasm, nucleolus, nuclear matrix and ribosomes.

Bacteria also have subcellular localizations that can be separated when the cell is fractionated. The most common localizations referred to include the cytoplasm, the cytoplasmic membrane (also referred to as the inner membrane in Gram-negative bacteria), the cell wall (which is usually thicker in Gram-positive bacteria) and the extracellular environment. Most Gram-negative bacteria also contain an outer membrane and periplasmic space. Unlike eukaryotes, most bacteria contain no membrane-bound organelles, however there are some exceptions.

There, we used wolfsort a subcellular localization predication soft to predict subcellular localization. Wolfpsort is an updated version of PSORT/PSORT II for the prediction of eukaryotic sequences. Special for protokaryon species, Subcellular localization prediction soft CELLO was used.

## **Functional Enrichment**

Enrichment of Gene Ontology analysis

Proteins were classified by GO annotation into three categories: biological process, cellular compartment and molecular function. For each category, a two-tailed Fisher's exact test was employed to test the enrichment of the differentially expressed protein against all identified proteins. The GO with a corrected p-value  $< 0.05$  is considered significant.



### Enrichment of pathway analysis

Encyclopedia of Genes and Genomes (KEGG) database was used to identify enriched pathways by a two-tailed Fisher's exact test to test the enrichment of the differentially expressed protein against all identified proteins. The pathway with a corrected p-value  $< 0.05$  was considered significant. These pathways were classified into hierarchical categories according to the KEGG website.

### Enrichment of protein domain analysis

For each category proteins, InterPro (a resource that provides functional analysis of protein sequences by classifying them into families and predicting the presence of domains and important sites) database was researched and a two-tailed Fisher's exact test was employed to test the enrichment of the differentially expressed protein against all identified proteins. Protein domains with a corrected p-value  $< 0.05$  were considered significant.

### **Enrichment-based Clustering**

For further hierarchical clustering based on differentially expressed protein functional classification (such as: GO, Domain, Pathway, Complex). We first collated all the categories obtained after enrichment along with their P values, and then filtered for those categories which were at least enriched in one of the clusters with P value  $< 0.05$ . This filtered P value matrix was transformed by the function  $x = -\log_{10}(\text{P value})$ . Finally these x values were z-transformed for each functional category. These z scores were then clustered by one-way hierarchical clustering (Euclidean distance, average

linkage clustering) in Genesis. Cluster membership were visualized by a heat map using the “heatmap.2” function from the “g plots” R-package.

### **Protein-protein Interaction Network**

All differentially expressed protein database accession or sequence were searched against the STRING database version 10.1 for protein-protein interactions. Only interactions between the proteins belonging to the searched data set were selected, thereby excluding external candidates. STRING defines a metric called “confidence score” to define interaction confidence; we fetched all interactions that had a confidence score  $\geq 0.7$  (high confidence). Interaction network form STRING was visualized in R package “networkD3”.

**Figure S1** Differentially expressed proteins associated with neuro development in T21 male vs CN male group and T21 female vs CN female group

**Figure S2** Differentially expressed proteins associated with growth in T21 male vs CN male group and T21 female vs CN female group

**Figure S3** Differentially expressed proteins associated with cardiac development in T21 male vs CN male group and T21 female vs CN female group

**Figure S4** Differentially expressed proteins associated with hematopoietic in T21 male vs CN male group and T21 female vs CN female group

**Figure S5** Differentially expressed proteins associated with immune in T21 male vs CN male group and T21 female vs CN female group

**Figure S6** Differentially expressed proteins associated with reproduction in T21 male vs CN male group and T21 female vs CN female group

**Figure S7** Differentially expressed proteins associated with neuro development in T21 male vs T21 male group, CN male and CN female group

**Figure S8** Differentially expressed proteins associated with growth in T21 male vs T21 male group, CN male and CN female group

**Figure S9** Differentially expressed proteins associated with cardiac development in T21 male vs T21 male group, CN male and CN female group

**Figure S10** Differentially expressed proteins associated with hematopoietic in T21 male vs T21 male group, CN male and CN female group

**Figure S11** Differentially expressed proteins associated with immune in T21 male vs T21 male group, CN male and CN female group

**Figure S12** Differentially expressed proteins associated with reproduction in T21 male vs T21 male group, CN male and CN female group

Figure S1

T21 female vs. CN female

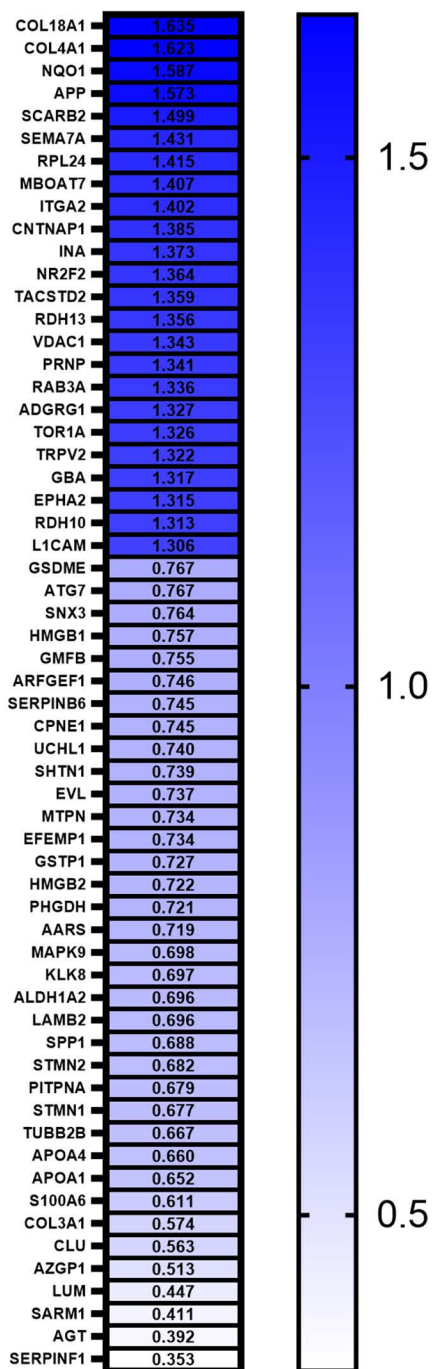

T21 male vs. CN male

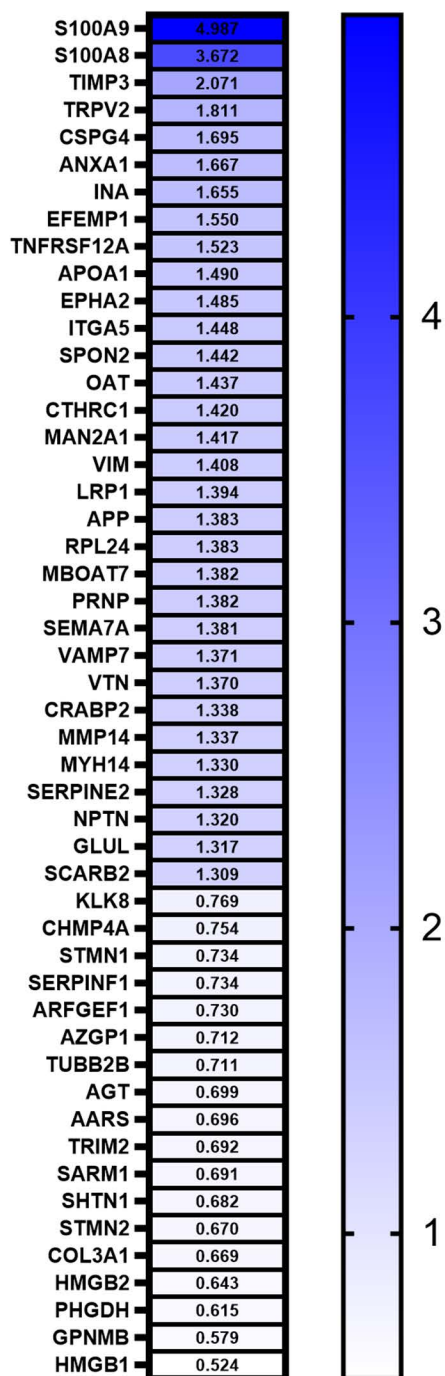

Figure S2

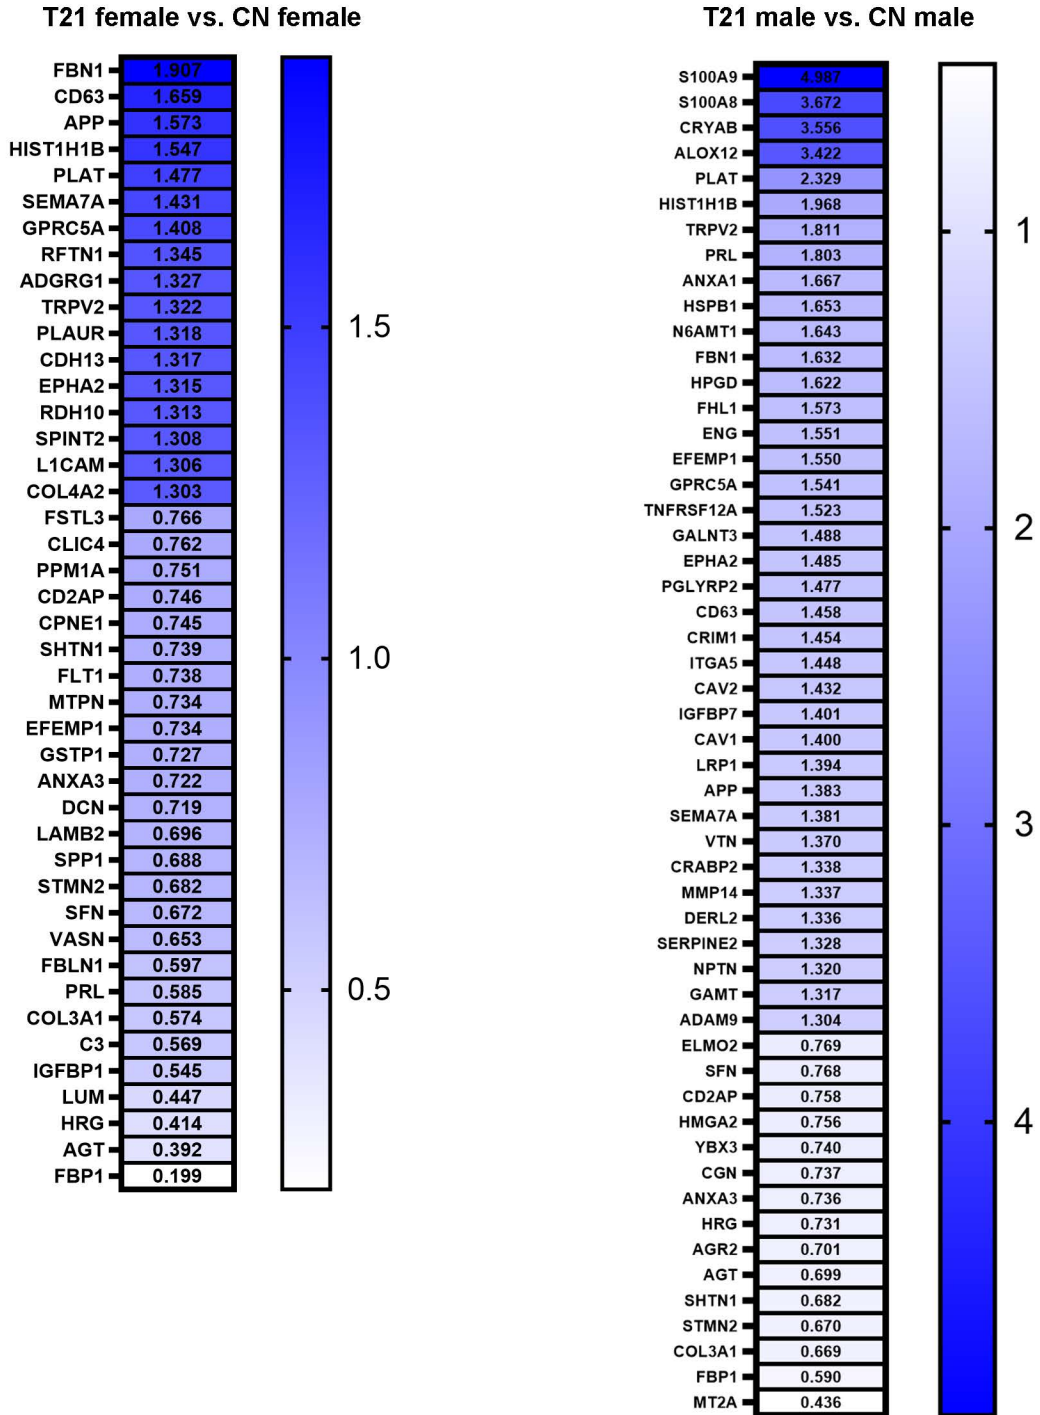

Figure S3

T21 female vs. CN female

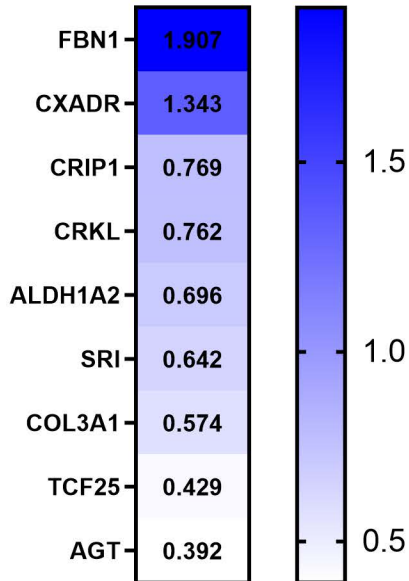

T21 male vs. CN male

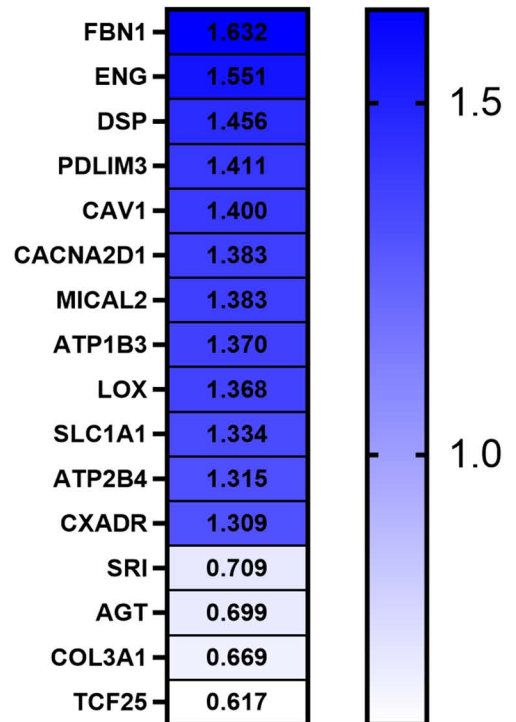

Figure S4

**T21 female vs. CN female**

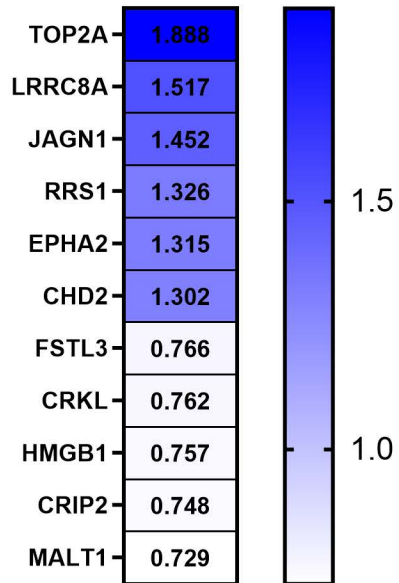

**T21 male vs. CN male**

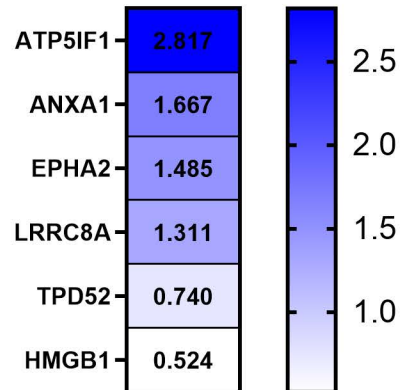

Figure S5

T21 female vs. CN female

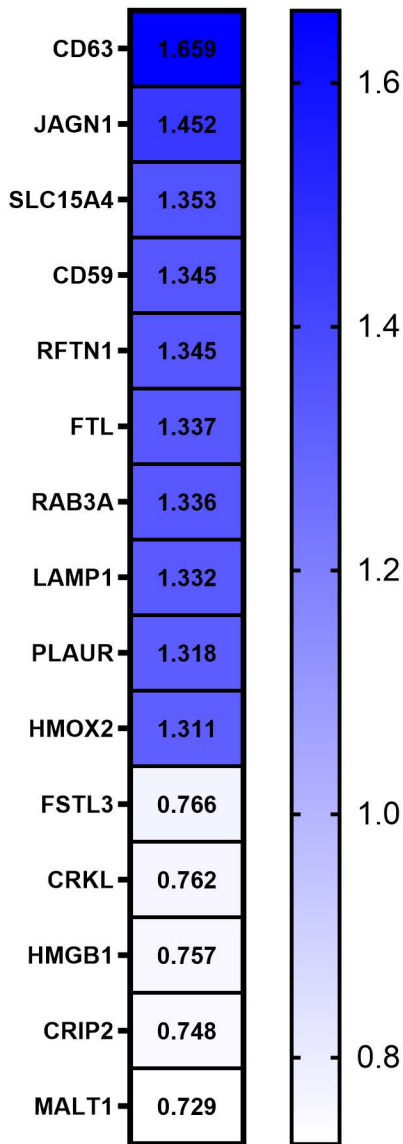

T21 male vs. CN male

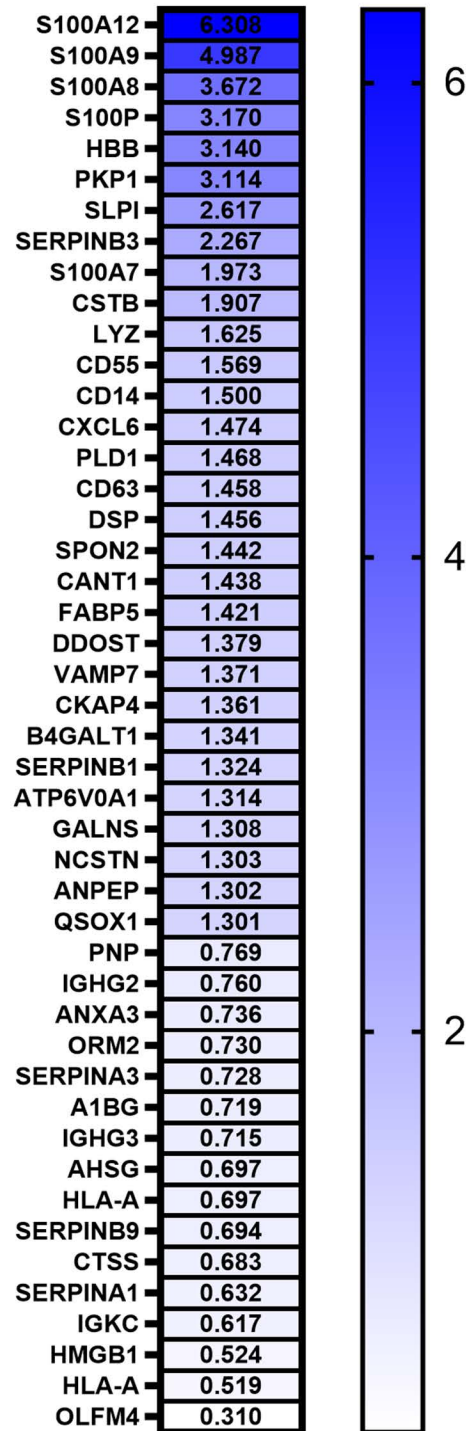



Figure S6

T21 female vs. CN female

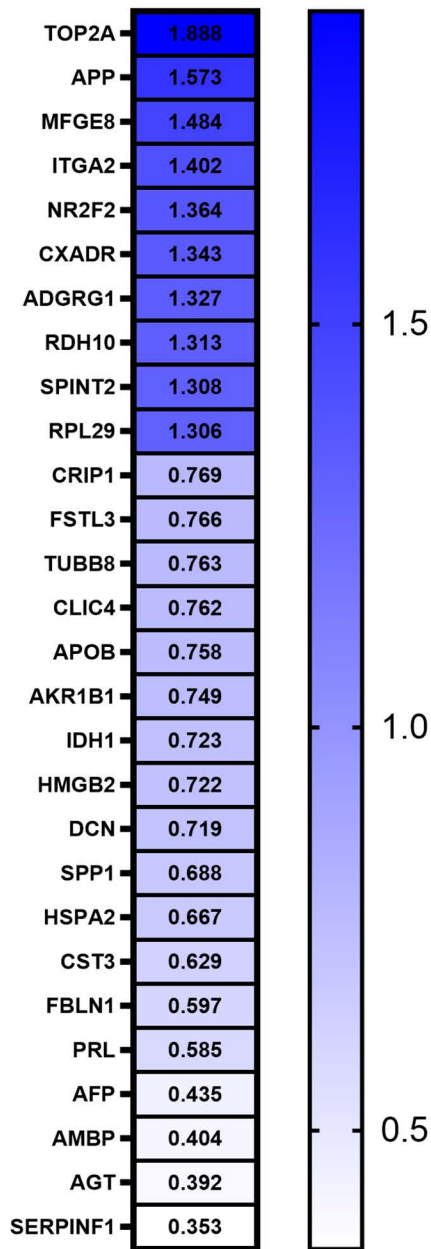

T21 male vs. CN male

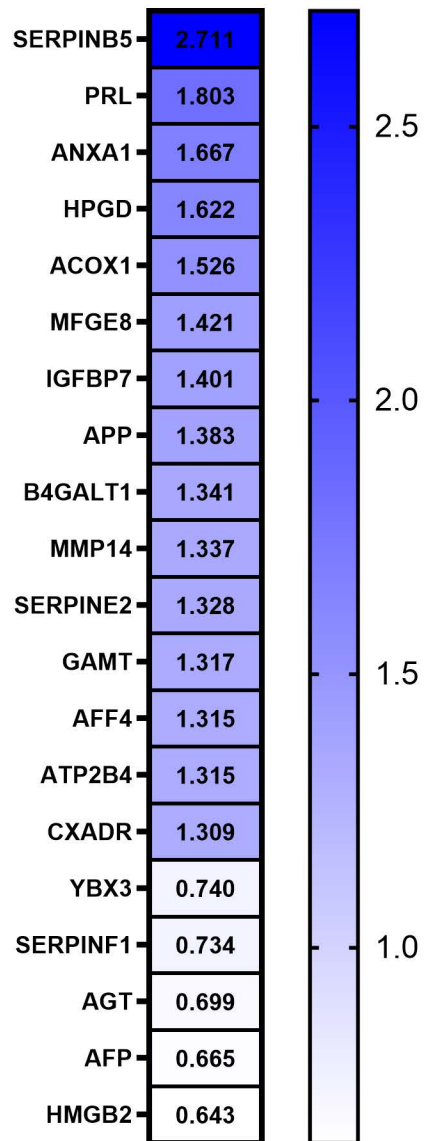

Figure S7

**T21 male vs T21 female  
and CN male vs CN male**

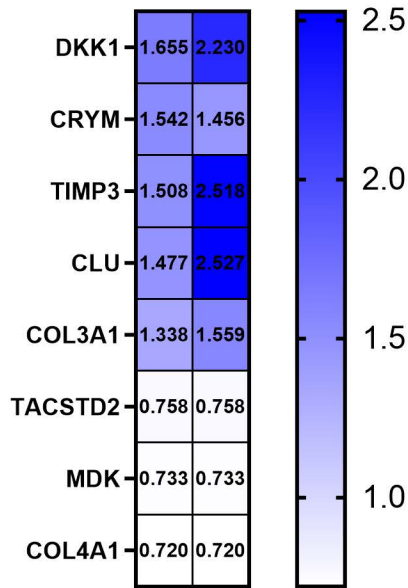

**CN male vs CN female**

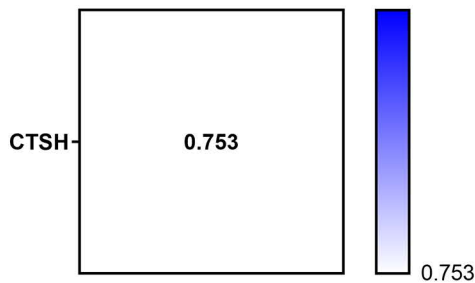

**T21 male vs T21 female**

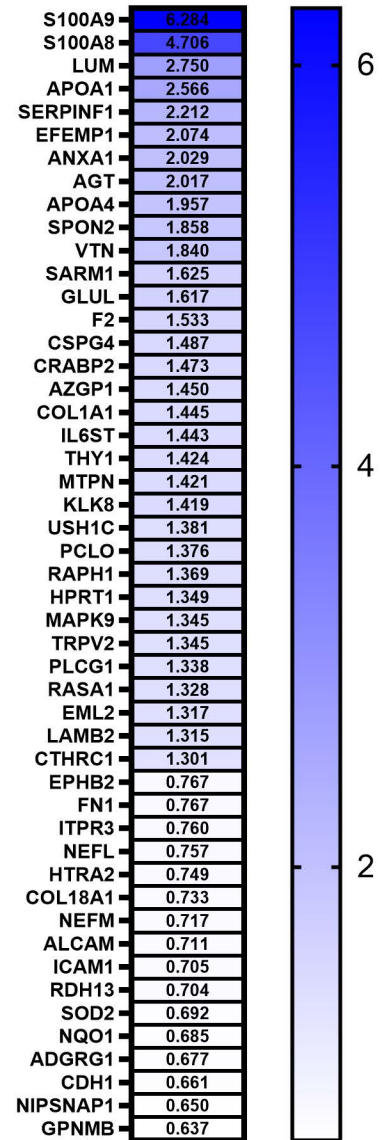

Figure S8

**T21 male vs T21 female  
and CN male vs CN male**

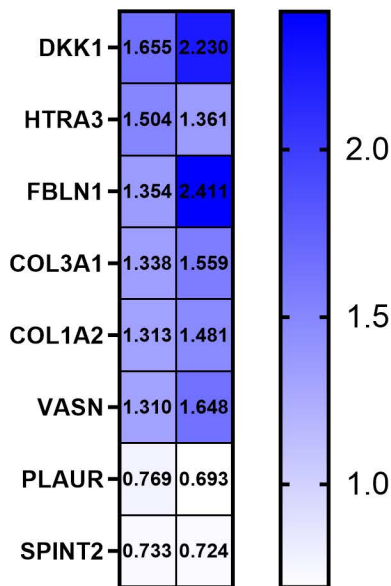

**CN male vs CN female**

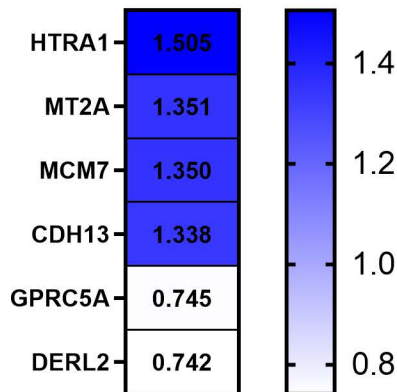

**T21 male vs T21 female**

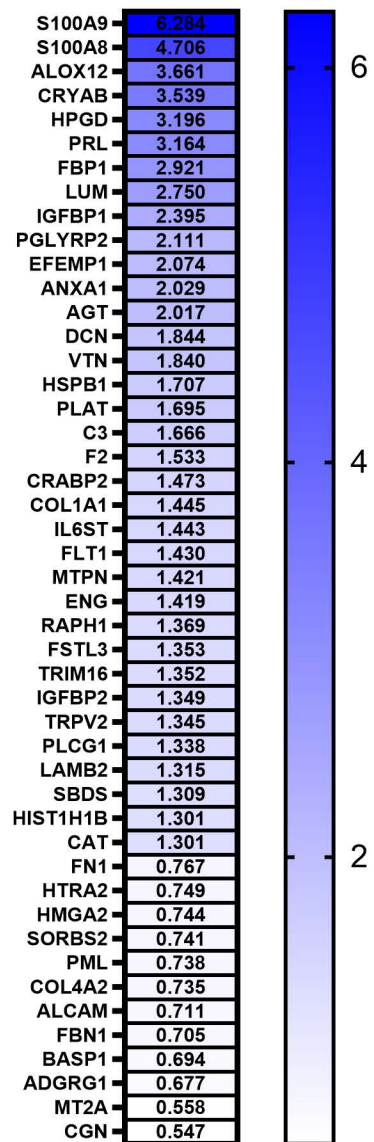

Figure S9

**T21 male vs T21 female  
and CN male vs CN male**

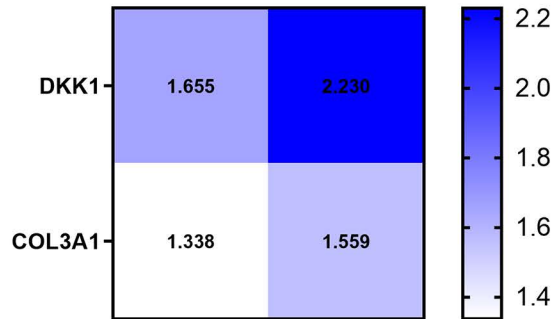

**T21 male vs T21 female**

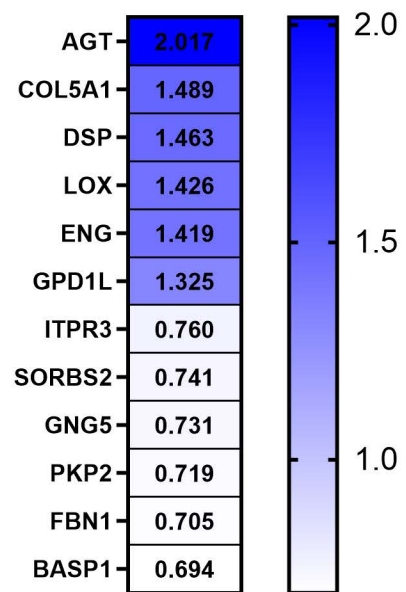

**CN male vs CN female**

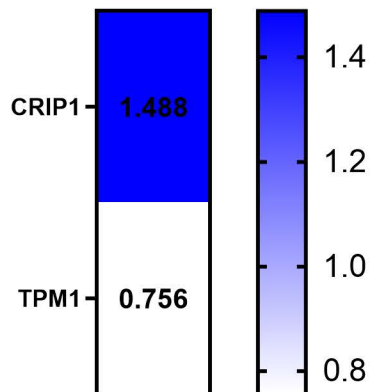

Figure S10

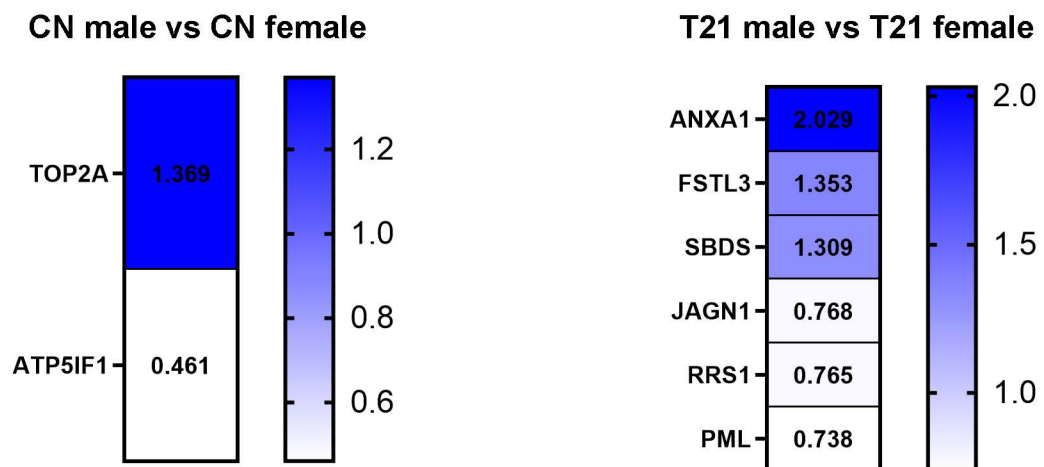

Figure S11

**T21 male vs T21 female  
and CN male vs CN male**

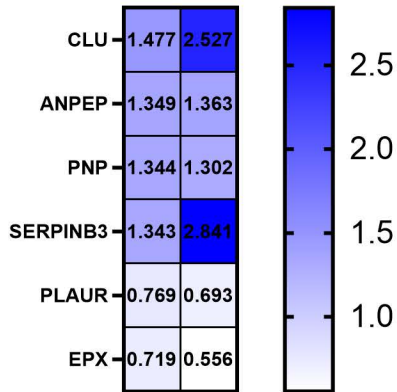

**CN male vs CN female**

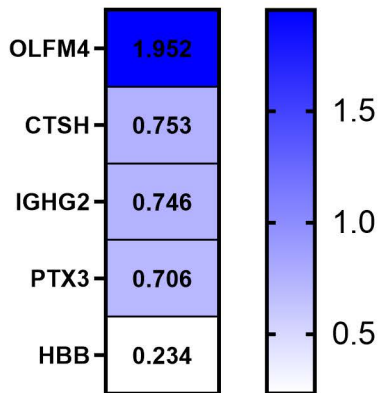

**T21 male vs T21 female**

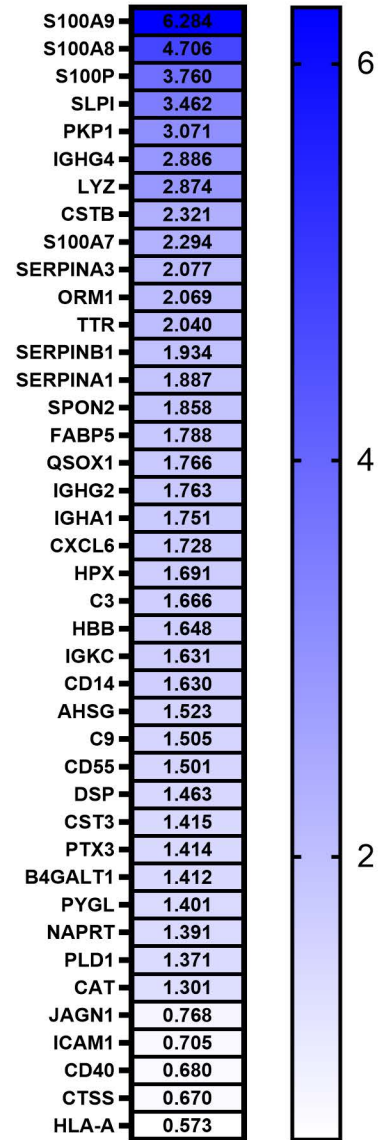

Figure S12

**T21 male vs T21 female  
and CN male vs CN male**

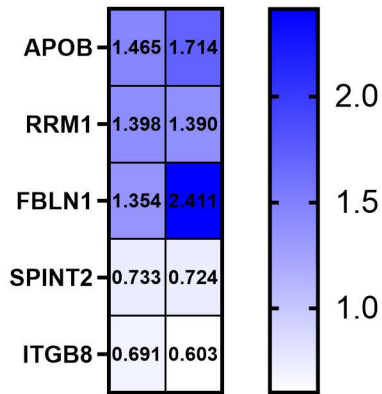

**CN male vs CN female**

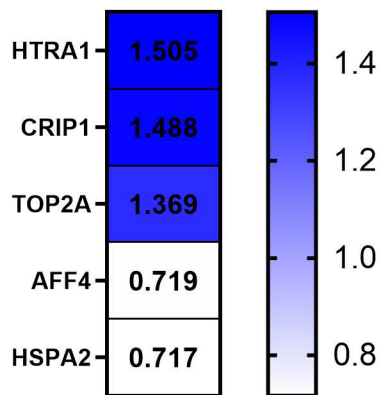

**T21 male vs T21 female**

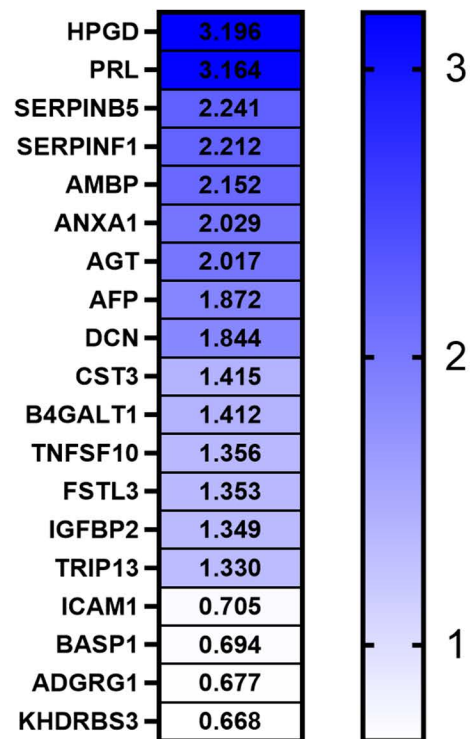

Supplement: ao2c05152_si_001.pdf [file ao2c05152_si_001.pdf]
